# Supplementary material
Source: PubMed Central journal article supplement (PMC4168367)
Supplement: gf531de_10-1055-s-0032-1315365.pdf [file gf531de_10-1055-s-0032-1315365.pdf]

# Vitamine E, A und B<sub>2</sub> als mögliche Risikofaktoren für Präeklampsie – unter Berücksichtigung der PROPER-Studie („Prevention of Preeclampsia by high dose Riboflavin supplementation“)

Vitamins E, A and B<sub>2</sub> as Possible Risk Factors for Preeclampsia – under Consideration of the PROPER Study (“Prevention of Preeclampsia by High-Dose Riboflavin Supplementation”)

**Autoren** C. Elsen<sup>1</sup>, C. Rivas-Echeverría<sup>2</sup>, K. Sahland<sup>2</sup>, R. Sánchez<sup>2</sup>, L. Molma<sup>2</sup>, L. Pahl<sup>3</sup>, R. Wallinger<sup>3</sup>, J. Volz<sup>4</sup>, J. Wacker<sup>5</sup>, J. Frühauf<sup>6</sup>

**Institute** Die Institutsangaben sind am Ende des Beitrags gelistet

## Schlüsselwörter

- Präeklampsie
- Geburtshilfe
- Geburt

## Key words

- Preeclampsia
- obstetrics
- childbirth

**eingereicht** 18.3.2012

**revidiert** 12.8.2012

**akzeptiert** 16.8.2012

## Bibliografie

**DOI** <http://dx.doi.org/10.1055/s-0032-1315365>  
 Geburtsh Frauenheilk 2012; 72: 1–7 © Georg Thieme Verlag KG  
 Stuttgart · New York ·  
 ISSN 0016-5751

## Korrespondenzadresse

**Dr. Christoph Elsen, Facharzt**  
 St. Josefs-Hospital Wiesbaden  
 Frauenklinik  
 Schau-ins-Land 9  
 65189 Wiesbaden  
 icchris2006@yahoo.de

## Zusammenfassung

Im Rahmen der prospektiven, randomisierten, doppelt-blinden Studie wurde der Einfluss einer hoch dosierten Riboflavinsubstitution auf das Präeklampsierisiko in einem Hochrisikokollektiv untersucht [1]. Die vorliegende Arbeit wertet hierzu ergänzende Daten aus der bereits publizierten PROPER-Studie aus. Die Patientinnen stammten aus den beiden Studienzentren Mérida, Venezuela, und Moshi, Tansania, wurden ab der 20. SSW randomisiert und erhielten entweder 15 mg Riboflavin täglich oder Placebo. Bis zur Entbindung erfolgten klinische und laborchemische Kontrollen in 4-wöchentlichem Abstand. Zur Klärung der Frage, ob ein Zusammenhang zwischen Serumspiegeln antioxidativer Vitamine und dem Risiko, an Präeklampsie zu erkranken, besteht, zeigte sich, dass das Gesamtrisiko, eine hypertensive Schwangerschaftserkrankung zu entwickeln, keinen Zusammenhang mit laborchemisch gemessenen Vitaminspiegeln E, A und B<sub>2</sub> erkennen ließ. Beim Vergleich zwischen Patientinnen, die an schwerer Präeklampsie erkrankten, mit leichten Formen und der gesunden Kontrollpopulation fanden sich allerdings signifikante Unterschiede in der Höhe der antioxidativen Vitamine E und A sowie der FAD-Spiegel. Patientinnen aus Tansania zeigten insgesamt signifikant niedrigere Vitaminspiegel als Schwangere aus Venezuela, möglicherweise bedingt durch eine bessere Ernährungssituation in Venezuela. In Zusammenschau der Ergebnisse bleibt die Bedeutung antioxidativer Parameter in der Pathophysiologie der Präeklampsie weiterhin unklar. Die erhobenen Daten liefern jedoch wertvolle Informationen für zukünftige Präventionsstrategien.

## Abstract

In the course of the prospective, randomized, double-blind trial the influence of a high-dose riboflavin substitution on the risk for preeclampsia was studied in a high-risk collective [1]. The present contribution evaluates supplementary data from the already published PROPER trial. The patients were from the two study centers Mérida, Venezuela, and Moshi, Tanzania, they were randomized from the 20th week of pregnancy and received either 15 mg riboflavin daily or placebo. Clinical and laboratory checks were carried out at four-week intervals up to childbirth. Concerning the question of whether there is a relationship between the serum levels of antioxidative vitamins and the risk of developing preeclampsia, it was found that no relationship could be detected between the measured laboratory values of vitamins E, A and B<sub>2</sub> and the total risk of developing a hypertensive disease of pregnancy. On comparisons between patients with severe preeclampsia, those with a mild form, and the general healthy population, however, significant differences in the levels of antioxidative vitamins E and A as well as the FAD level were seen. The patients from Tanzania showed on the whole significantly lower vitamin levels than those from Venezuela, possibly due to the better nutritional situation in Venezuela. Considering the results altogether, the role of antioxidative parameters in the pathophysiology of preeclampsia remains unclear. However, the collected data provide valuable hints for future preventative strategies.

## Einleitung und Fragestellung

Präeklampsie ist die häufigste Ursache mütterlicher Todesfälle in Industrieländern und trägt maßgeblich zur perinatalen Mortalität und Morbidität bei [2]. Weltweit wird die Inzidenz der Präeklampsie mit 2 bis 10% angegeben. Nach Schätzung der WHO tritt die Erkrankung in Entwicklungsländern bis zu 7-mal häufiger auf als in Industrieländern [3]. Es existieren nahezu keine validen Prävalenzdaten aus Südamerika, in einigen afrikanischen Ländern tritt die Präeklampsie in bis zu 17% der Schwangerschaften auf [3].

Die Klinik der Präeklampsie beruht auf einer generalisierten endothelialen Dysfunktion, genaue Einflussfaktoren sind jedoch bisher nicht bekannt [2]. Oxidativer Stress und dabei entstehende Lipidperoxide werden als Auslöser von Membranschäden der Endothelzellen angesehen [4, 5]. Aufgrund einer plazentaren Hypoxie, ausgelöst durch immunologische Faktoren, oberflächliche Plazentation, oder schwangerschaft-intrinsische Faktoren (Zwillingsschwangerschaft, Polyhydramnion), kommt es in der Plazenta zu vermehrter Bildung von freien Radikalen und Lipidperoxiden [6, 7]. Im Anschluss werden Leukozyten aktiviert und von der Plazenta in die systemische Zirkulation abgegeben [8], welche über die Freisetzung von Zytokinen im mütterlichen Organismus eine generalisierte Entzündungsreaktion auslösen [9, 10], die nur durch antioxidative Systeme der Zellen kontrolliert werden kann. Die bei der Präeklampsie auftretende periphere Vasokonstriktion sowie die reduzierte plazentare Perfusion werden zudem durch die Inaktivierung des vasodilatatorischen NOSynthetase-Systems [11] sowie durch Verschiebung des PGI<sub>2</sub>-TXA<sub>2</sub>-Verhältnisses zugunsten des Vasokonstriktors Thromboxan A<sub>2</sub> verstärkt. Aggressive Lipidperoxide sind dabei für eine vermehrte Aktivierung der Zyklooxygenase, die ihrerseits wieder eine vermehrte Produktion von freien Radikalen induziert, verantwortlich. Ebenso kann mit einer vermehrten Bildung von Thromboxan A<sub>2</sub> die erhöhte Thrombozytenaggregationsneigung bei Präeklampsie erklärt werden [12].

Im Serum präeklampsischer Patientinnen sind die Spiegel antioxidativer Vitamine aufgrund eines vermehrten oxidativen Stresses mit erhöhtem Verbrauch antioxidativer Valenzen verringert [13]. Substitution antioxidativer Vitamine bei präeklampsischen Patientinnen blieben jedoch erfolglos, was auf einen bereits zu weit fortgeschrittenen Krankheitsprozess deuten könnte [14]. Bei Therapiebeginn in der 20. Schwangerschaftswoche konnte jedoch durch die Substitution der antioxidativen Vitamine E und C eine signifikante Reduktion der Präeklampsiefälle erreicht werden [15].

Bereits publizierte Ergebnisse der PROPER-Studie wiesen auf eine mögliche Prävention der Präeklampsie in einem Hochrisikokollektiv durch isolierte, hoch dosierte Riboflavinsubstitution hin [1]. Die vorliegende Arbeit untersucht nun ergänzend den Einfluss der antioxidativen Vitamine E, A und B<sub>2</sub> im Serum bzw. Vollblut bei Schwangeren aus der PROPER-Studie (PROPER – „Prevention of Preeclampsia with Riboflavin“) im Hinblick auf das Risiko, an einer Präeklampsie zu erkranken. Dabei werden 2 unterschiedliche Studienpopulationen (Schwangere aus Tansania bzw. Venezuela) mit einer jeweils gesunden Kontrollpopulation verglichen. Primärer Endpunkt der Studie war die Frage, ob und zu welchem Zeitpunkt in der Schwangerschaft die genannten Mikronährstoffe das Risiko, eine Präeklampsie zu entwickeln, beeinflussen. Sekundärer Endpunkt war neben der Beschreibung der Vitaminspiegel im Schwangerschaftsverlauf insbesondere

der Einfluss einer täglichen Riboflavinsubstitution auf die Höhe der Serumspiegel antioxidativer Vitamine.

## Material und Methode

### Patientinnen

Die Durchführung der Studie erfolgte von 2002–2005 in den beiden Studienzentren in Venezuela und Tansania. Ein Ethikvotum der zuständigen Ethikkommissionen wurde eingeholt.

Im ersten Studienzentrum in Mérida, Venezuela, erfolgte die Zusammenarbeit mit dem halbstaatlichen PPP, dem „Programm für die Prävention der Präeklampsie“ [17], innerhalb dessen schwangere Patientinnen mit Risiko für Präeklampsie flächendeckend erfasst und den entsprechenden Referenzzentren des Programms zugewiesen wurden. Insgesamt wurden hier 414 Frauen rekrutiert.

Das 2. Zentrum in Moshi, Tansania, wurde durch das Kilimanjaro Christian Medical Center, KCMC, repräsentiert. Aufgrund der deutlich geringeren flächendeckenden Erfassung von Risikopatientinnen und die erschwerte Infrastruktur konnten in Tansania lediglich 41 Patientinnen in die Studie aufgenommen werden, die jedoch aufgrund der monozentrischen Struktur eine nur minimale Drop-out-Rate zeigten.

### Randomisierung

Der Einschluss schwangerer Frauen in die Studie erfolgte bis zur 20. SSW bei Erfüllung einer der beiden Einschlusskriterien (1) Primigravida oder (2) Multigravida mit einer hypertensiven Erkrankung in einer vorangegangenen Schwangerschaft. Jede Patientin erhielt eine strukturierte Aufklärung in ihrer Muttersprache.

Studienteilnehmerinnen wurden fortlaufend randomisiert und zufällig in eine Riboflavin- oder Placebogruppe eingeteilt. Die Randomisierung erfolgte nach einem Blocksystem, welches sicherstellte, dass unter 10 aufgenommenen Patientinnen je 5 aus jeder Gruppe vorhanden waren. Die zugewiesene Nummerierung der Patientin erfolgte als fortlaufender Code mit dem zeitlichen Einschluss in die Studie.

### Studienmedikation

Die Studienmedikation wurde exkl. für die vorliegende Studie hergestellt. Versiegelte Medikamentenboxen, die entweder die Verum- oder die Placebomedikation enthielten, waren mit dem entsprechenden Randomisierungscode bedruckt. Diese wurden der Patientin bei jedem Besuch für jeweils einen Monat ausgehändigt. Die Studienteilnehmerinnen wurden 4-wöchentlich bis zur 37. SSW, danach wöchentlich bis zur Entbindung bestellt und gemäß Studienprotokoll untersucht und befragt. Ein unabhängiger Studienkoordinator führte nach Abschluss der Studie die Entblindung durch. Bei Einschluss in die Studie um die 20. Schwangerschaftswoche erhielt die Patientin je nach Randomisierung 15 mg Riboflavin täglich oder das identisch aussehende Placebopräparat.

### Durchführung der Studie

Bei jeder Vorstellung der Patientin wurden neben der Datenerhebung mittels eines Fragebogens Plasmaproben aus venösem Blut bzw. zum Zeitpunkt der Geburt auch Nabelschnurblut entnommen und bei –20 °C lichtgeschützt bis zur Analyse gelagert. Die Bestimmung der Plasmaspiegel von FAD (Flavin-Adenin-Dinucleotid), Vitamin E (Tocopherol) und Vitamin A (Retinol) wurde

mittels HPLC („high performance liquid chromatography“) gemäß Standardprozeduren durchgeführt [18].

Eine Studienteilnehmerin wurde als hypertensiv klassifiziert, wenn der diastolische Blutdruck nach der 20. SSW größer 90 mmHg gemessen wurde, der systolische Blutdruck größer 140 mmHg, oder ein relativer Anstieg des Blutdrucks während der Schwangerschaft von diastolisch mehr als 15 mmHg oder systolisch von mehr als 30 mmHg beobachtet wurde. Eine Präeklampsie wurde diagnostiziert, wenn zusätzlich zur Hypertonie das Vorhandensein einer signifikanten Proteinurie größer 300 mg/l nach dem Dip-Stick-Test vorlag. Eine schwere Präeklampsie lag vor, wenn darüber hinaus neurologische Symptome auftraten, wie z. B. Flimmersehen, Hyperreflexie, eine Eklampsie, oder wenn der diastolische Blutdruck größer 110 mmHg gemessen wurde.

### Statistik

Die statistische Auswertung erfolgte mittels SPSS für Windows, Version 10.0. In Zusammenarbeit mit der Abteilung für Biometrie der Mathematischen Fakultät der Universität Heidelberg wurden insbesondere Mittelwertvergleiche für unabhängige Stichproben (Student's t-test), der  $\chi^2$ -Test und einfaktorische Varianzanalysen (ANOVA) durchgeführt. P-Werte < 0,05 wurden als signifikant betrachtet.

### Ergebnisse

Insgesamt wurden in allen Studienzentren zusammen 455 Patientinnen eingeschlossen und randomisiert. Der Beitrag der venezolanischen Studienpatientinnen am Gesamtkollektiv lag mit 414 gegenüber 41 Teilnehmerinnen in Tansania ca. 10-fach höher.

In Venezuela wurden die Patientinnen bereits ab der 12. Schwangerschaftswoche in die Studie eingeschlossen, Schwangere aus Tansania wurden erst ab der 20. SSW rekrutiert. Weiterhin unterschieden sich beide Kollektive in der Zahl der rekrutierten Primigravidae voneinander, die in Venezuela mit 55,2% deutlich niedriger lag als in Tansania mit 87,8%. Dementsprechend lag die Anzahl der bisherigen Schwangerschaften in Venezuela mit durchschnittlich 1,9 pro Patientin deutlich höher als im untersuchten Kollektiv aus Tansania (durchschnittlich 1,1 Schwangerschaften). Insgesamt zeigten 13,3% der Patientinnen Symptome einer hypertensiven Schwangerschaftserkrankung, in Tansania mit 12,2% unwesentlich weniger als in Venezuela mit 13,5%. Das Placebopräparat erhielten 49,9% der Teilnehmerinnen, 50,1% erhielten die Studienmedikation Riboflavin in einer täglichen Dosierung von 15 mg ab der 20. SSW.

Die Verlustrate betrug im Gesamtkollektiv 12,5%. In Venezuela lag die Verlustrate mit 13,5% deutlich höher als im erheblich kleineren tansanischen Kollektiv, in dem lediglich 2,4% der Patientinnen schon die erste Follow-up-Untersuchung versäumten.

### Prävalenz der Präeklampsie

In Venezuela und Tansania waren die Anteile der Patientinnen, die eine Präeklampsie (PE) bzw. eine schwangerschaftsinduzierte Hypertonie (SIH) entwickelten, statistisch gesehen nicht unterschiedlich (● Tab. 1).

Bei der Subgruppenanalyse der hypertensiven Erkrankungen in unterschiedliche Schweregrade fällt allerdings eine deutliche Diskrepanz zwischen beiden Ländern bei den schweren Präeklampsien auf: Schwere Formen der Erkrankung traten in Vene-

**Tab. 1** Häufigkeitsverteilung der unterschiedlichen Schweregrade der hypertensiven Schwangerschaftserkrankung von Patientinnen der PROPER-Studie.

|                            | schwangerschaftsinduzierte Hypertonie (SIH) (%) |        | Präeklampsie (PE) und Eklampsie (%) |          |
|----------------------------|-------------------------------------------------|--------|-------------------------------------|----------|
|                            | leicht                                          | schwer | leicht                              | schwer   |
| Gesamtkollektiv<br>n = 455 | 5,3                                             |        | 8,0                                 |          |
|                            | 4,7                                             | 0,7    | 4,4                                 | 3,7      |
| Venezuela<br>n = 414       | 5,4                                             |        | 8,1                                 |          |
|                            | 4,6                                             | 0,8    | 3,8                                 | 4,2      |
| Tansania<br>n = 41         | 4,9                                             |        | 7,3                                 |          |
|                            | 4,9                                             | 0,0    | 7,3                                 | 0,0      |
| sign. Level                | n. s.                                           | n. s.  | n. s.                               | p < 0,01 |

n. s.: nicht signifikant;  $\chi^2$

zuela in 4,2% (10 Fälle) auf, wohingegen diese schwere Krankheitsausprägung in Tansania nicht beobachtet wurde. Daneben wurde im venezolanischen Kollektiv ein Fall von Eklampsie beobachtet.

### Vitamin E

Insgesamt wurden 505 Einzelbestimmungen von Vitamin E aus dem Serum der Schwangeren zu konsekutiven Zeitpunkten der Schwangerschaft vorgenommen, was einer Gesamtzahl von 107 komplett analysierten Studienteilnehmerinnen entspricht. Im Durchschnitt wurden somit 4,72 Bestimmungen pro Patientin in 4-wöchentlichem Abstand durchgeführt. Hinzu kam die Analyse von 36 Nabelschnurblut-Seren aus diesem Kollektiv.

Die Vitamin-E-Spiegel zeigten insgesamt einen asymptotischen Anstieg bis zu einem Maximum in der 38. Woche, danach abfallende Spiegel bis zum Geburtstermin und einen weiteren Abfall bei Übertragung (40+). Die Nabelschnurwerte für Vitamin E lagen bei  $\frac{1}{3}$ – $\frac{1}{4}$  der mütterlichen Werte (● Abb. 1).

Im Vergleich beider Länder zeigten Patientinnen aus Venezuela durchweg und signifikant höhere Vitamin-E-Spiegel als das Vergleichskollektiv aus Tansania ( $p < 0,05$  für 24., 28. und 38. Woche). Im Nabelschnurblut fanden sich keine Unterschiede zwischen beiden Kollektiven (● Abb. 1).

Es konnte zu keinem Zeitpunkt der Schwangerschaft ein signifikanter Zusammenhang zwischen den gemessenen Vitamin-E-Spiegeln und dem Risiko, eine hypertensive Schwangerschaftserkrankung zu entwickeln, beschrieben werden. In der Subgruppenanalyse unterschiedlicher Schweregrade der hypertensiven Schwangerschaftserkrankung zeigte sich jedoch, dass die Vitamin-E-Serumspiegel von Patientinnen mit schwerer Präeklampsie gegenüber allen übrigen Patientinnen (leichte Erkrankungsformen und gesunde Kontrollen), insbesondere von der 20. bis zur 28. Woche deutlich erhöht waren. Ein signifikantes Ergebnis zeigte sich in der 28. SSW ( $p < 0,05$ , ● Abb. 2). Insbesondere fanden sich erniedrigte Vitaminspiegel bei Patientinnen, die eine leichte Form der Präeklampsie oder eine SIH entwickelten, sogar gegenüber den gesunden Patientinnen. Alle übrigen Serumspiegel lagen im schwangerschaftsbezogenen Normbereich einer gesunden Kontrollgruppe (● Abb. 2).

Eine Riboflavinsupplementierung ab der 20. SSW zeigte im Vergleich mit der Placebogruppe keinen Einfluss auf die Höhe der Vi-

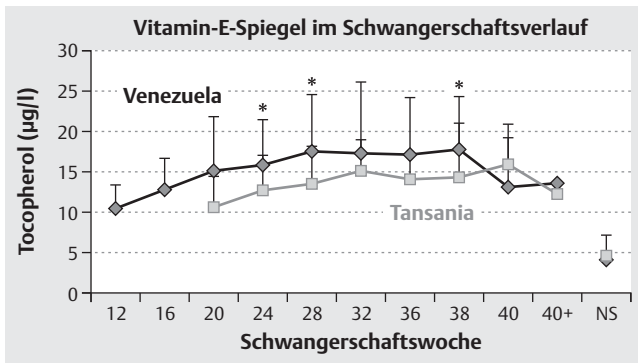

**Abb. 1** Mittelwerte mit STD. Vitamin E im Schwangerschaftsverlauf – Ländervergleich. NS: Nabelschnur; Vitamin-E-Spiegel in µg/l; n = 505; t-test; \*  $p < 0,05$

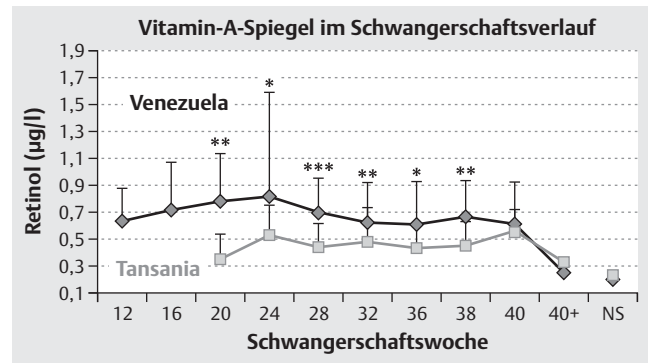

**Abb. 3** Mittelwerte mit STD. Vitamin A im Schwangerschaftsverlauf – Ländervergleich. NS: Nabelschnur; Vitamin-A-Spiegel in µg/l; n = 504; t-test; \*  $p < 0,05$ ; \*\*  $p < 0,01$ ; \*\*\*  $p < 0,005$

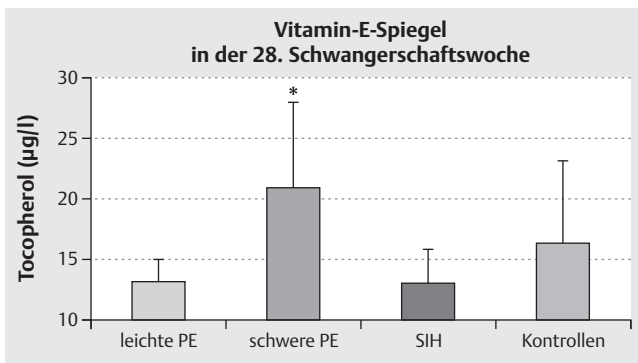

**Abb. 2** Mittelwerte mit STD. Vitamin E 28. Schwangerschaftswoche nach Schweregraden der Präeklampsie (PE) und Kontrollen. Vitamin-E-Spiegel in µg/l; n = 107; t-test; \*  $p < 0,05$

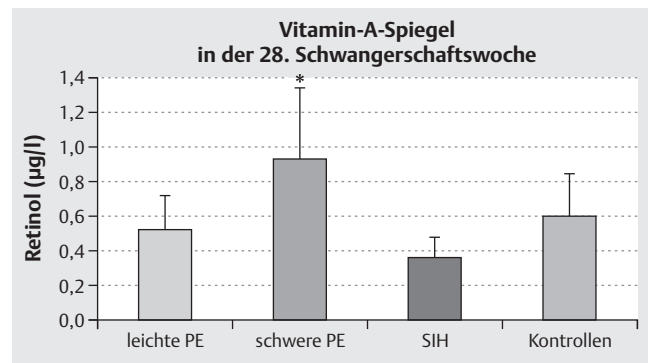

**Abb. 4** Mittelwerte mit STD. Vitamin A 28. Schwangerschaftswoche nach Schweregraden der Präeklampsie (PE) und Kontrollen. Vitamin-A-Spiegel in µg/l; n = 109; t-test; \*  $p < 0,05$

tamin-E-Spiegel im Serum, weder während der Schwangerschaft noch im Nabelschnurblut (Daten nicht gezeigt).

### Vitamin A

Es wurden 504 Einzelbestimmungen für Vitamin A bei 109 komplett analysierten Studienteilnehmerinnen durchgeführt, was 4,62 Serumproben pro Patientin entspricht. Von 36 Patientinnen führten wir zusätzlich Vitamin-A-Bestimmungen im Nabelschnurblut durch.

Im Gesamtkollektiv der Frauen aus beiden Ländern stiegen die Vitamin-A-Spiegel bis zur 24. SSW leicht an, blieben danach recht konstant bis zur 40. Schwangerschaftswoche, um bei Übertragung noch einmal abzufallen. Die Nabelschnurwerte entsprachen insgesamt  $\frac{1}{2}$ – $\frac{1}{2}$  der mütterlichen Werte. Maternale Vit.-A-Spiegel zeigten somit im Gesamtkollektiv eine abnehmende Tendenz (● **Abb. 3**).

Im Vergleich beider Länder lagen – wie auch bei Vit. E – die Vitamin-A-Spiegel bei Patientinnen aus Tansania während der gesamten Schwangerschaft signifikant niedriger (● **Abb. 3**). Lediglich ab der 40. SSW fielen die Vitamin-A-Spiegel der venezolanischen Patientinnen unter die Spiegel der Schwangeren aus Tansania, bei allerdings niedrigen Fallzahlen.

Zu keinem Zeitpunkt konnte ein Zusammenhang zwischen den gemessenen Vitamin-A-Spiegeln und dem Risiko, eine hypertensive Schwangerschaftserkrankung zu entwickeln, gefunden werden. Die Subgruppenanalyse der unterschiedlichen Schweregra-

de der hypertensiven Schwangerschaftserkrankungen ergab jedoch deutlich erhöhte Vitamin-A-Serumspiegel zwischen der 20. und 28. SSW bei Patientinnen mit schwerer Präeklampsie. Auch hier war das Ergebnis in der 28. SSW signifikant ( $p < 0,05$ , ● **Abb. 4**).

Eine tägliche Gabe von 15 mg Riboflavin hatte von der 20. bis zur 24. sowie in der 40. SSW einen positiven Einfluss auf die Höhe der Vitamin-A-Spiegel.

### Vitamin B<sub>2</sub>

Flavin-Adenin-Dinucleotid (FAD) wurde als Marker für den Riboflavinstatus bestimmt. Insgesamt wurden 456 Einzelbestimmungen von FAD mittels HPLC durchgeführt, was 102 Studienteilnehmerinnen mit durchschnittlich 4,47 Bestimmungen pro Patientin entspricht. Von 39 Patientinnen wurden zusätzlich Nabelschnuranalysen durchgeführt.

Die FAD-Spiegel zeigten während der gesamten Schwangerschaftsdauer einen relativ konstanten Verlauf mit nur in Venezuela letztendlich ansteigenden Werten um die 36. SSW, erneutem Abfall um die 38. Woche und erneutem Anstieg zum Schwangerschaftsende hin. Im venezolanischen Kollektiv lagen die FAD-Spiegel stets signifikant höher als in Tansania. Die Nabelschnurwerte lagen dagegen im tansanischen Kollektiv über den durchschnittlichen FAD-Spiegeln der Mütter (● **Abb. 5**).

Im Gegensatz zum Abfall der Nabelschnurwerte der antioxidativen Vitamine E und A gegenüber den mütterlichen Werten blie-

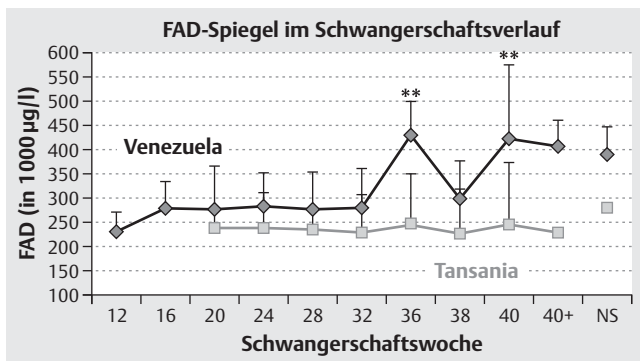

**Abb. 5** Mittelwerte mit STD. Vitamin B<sub>2</sub> im Schwangerschaftsverlauf – Ländervergleich. NS: Nabelschnur; Vitamin-B<sub>2</sub>-Spiegel in µg/l; n = 456; t-test; \*\* p < 0,01

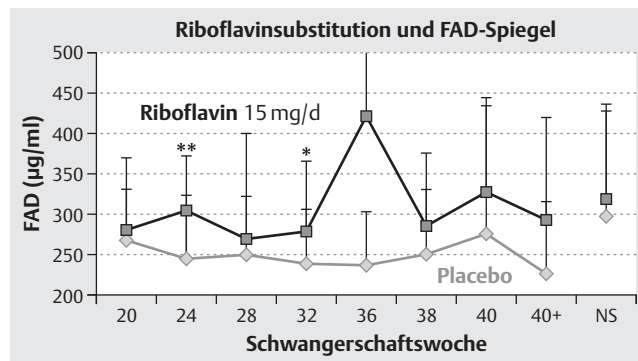

**Abb. 7** Mittelwerte mit STD. Einfluss einer Riboflavinsubstitution auf FAD-Spiegel im Schwangerschaftsverlauf. NS: Nabelschnur; Vitamin-B<sub>2</sub>-Spiegel in µg/l; n = 102; t-test; \* p < 0,05; \*\* p < 0,01

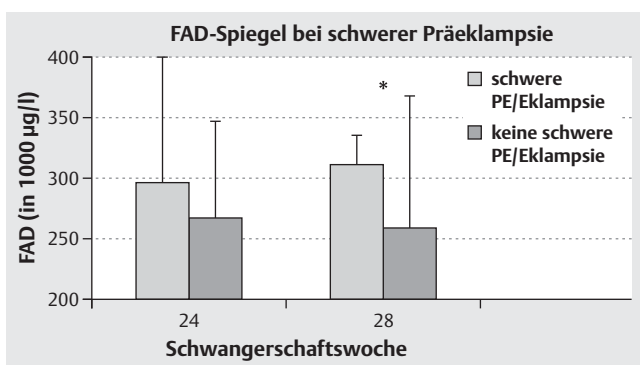

**Abb. 6** Mittelwerte mit STD. Vitamin B<sub>2</sub> bei schwerer Präeklampsie in der 24. und 28. SSW gegenüber Kontrollen. Vitamin-B<sub>2</sub>-Spiegel in µg/l; n jeweils pro SSW = 102; t-test; \* p < 0,05

ben die Vitamin-B<sub>2</sub>-Level im Nabelschnurblut gegenüber den maternalen Spiegeln in beiden Kollektiven konstant, in Tansania lagen die Nabelschnurwerte sogar leicht über den mütterlichen FAD-Spiegeln.

In der 16. Woche – somit vor Beginn der Einnahme der Studienmedikation – zeigten sich in der Gruppe der später an Präeklampsie (PE) oder schwangerschaftsinduzierter Hypertonie (SIH) Erkrankten signifikant niedrigere FAD-Spiegel gegenüber den gesunden Kontrollen (p < 0,05). Ab der 20. SSW bis zur Entbindung fanden sich leicht erhöhte FAD-Spiegel in der Gruppe der erkrankten Patientinnen gegenüber der Kontrollgruppe. Die FAD-Spiegel im Nabelschnurblut zeigten keine Unterschiede.

Vergleicht man nun FAD-Spiegel der Patientinnen, die an schwerer Präeklampsie oder Eklampsie erkrankten, mit Studienteilnehmerinnen mit lediglich leichten PE- oder SIH-Ausprägungen sowie gesunden Kontrollen, so zeigten sich in der 24. SSW deutlich erhöhte und in der 28. SSW statistisch signifikant erhöhte Werte für FAD in der Gruppe der schweren Präeklampsien (p < 0,05). Zu den übrigen Schwangerschaftszeitpunkten wurden keine Unterschiede in den FAD-Spiegeln zwischen beiden Gruppen beobachtet (● Abb. 6).

Bei Untersuchung des Einflusses einer täglichen Riboflavinsubstitution auf die tatsächlich gemessenen FAD-Spiegel im Vollblut zeigte sich für beide Studienzentren eine klare Korrelation der FAD-Spiegel mit einer täglichen Einnahme von Vitamin B<sub>2</sub> im Verlauf der Schwangerschaft im Verumarm der Studie, wobei

die Werte in Tansania noch deutlich stärker zunahm als in Venezuela. Ab der 20. SSW zeigten sich in der Gruppe der Riboflavinsubstituierten durchweg höhere FAD-Spiegel als in der Gruppe der Patientinnen, die ein Placebopräparat erhielten, gleiches galt für die FAD-Spiegel im Nabelschnurblut (● Abb. 7).

### Multivitaminpräparate

Zahlreiche Patientinnen gaben die regelmäßige Einnahme von Multivitaminpräparaten während der Schwangerschaft an. Bei der Untersuchung der Vitamin-E- und -A-Spiegel konnte bei den zusätzlich substituierten Patientinnen ein additiver Einfluss auf die Höhe der Serumspiegel nachgewiesen werden. Bei der Auswertung der FAD-Spiegel zeigte sich kein Effekt. Der Inhalt dieser zusätzlich eingenommenen Präparate konnte aus logistischen Gründen nicht weiter untersucht werden.

### Diskussion

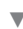

Die vorliegenden Ergebnisse zeigen zunächst keinen Zusammenhang zwischen dem Vitaminstatus der antioxidativen Vitamine E, A und B<sub>2</sub> und der Entwicklung einer hypertensiven Schwangerschaftserkrankung in den untersuchten Kollektiven. Untersucht man jedoch den Einfluss der Vitaminspiegel auf unterschiedliche Schweregrade der Präeklampsie, so finden sich bei den schweren Präeklampsien und Eklampsien vor allem um die 28. Schwangerschaftswoche signifikant erhöhte Parameter im Vergleich zu leichteren Formen der Erkrankung und zur gesunden Kontrollgruppe.

Chappell et al. [15] hatten 1999 erstmals von der Möglichkeit berichtet, Präeklampsie in einem Hochrisikokollektiv durch die Gabe von hoch dosierten antioxidativen Vitaminen einschließlich Vitamin E zu verhindern. Bislang konnte dieses Ergebnis jedoch von keiner anderen Gruppe wiederholt oder verifiziert werden.

In einer randomisierten Prospektivstudie [19] wurden Patientinnen eines Risikokollektivs für Präeklampsie ab der 14.–20. SSW mit hohen Dosen von Vitamin E (400 IE/d) und Vitamin C (1000 mg/d) supplementiert, ein Kontrollarm erhielt Placebo. Die Studie erreichte nicht die geplante Patientenzahl, aber im ausgewerteten Kollektiv konnte kein signifikanter Benefit der Vitaminbehandlung nachgewiesen werden.

In einer aktuellen prospektiven Substitutionsstudie von Poston et al. [20] konnte ebenso kein präventiver Effekt einer Vitamin-A-

und -E-Supplementierung gezeigt werden. Weiterhin wurden in einer Metaanalyse der Cochrane Library [21,22] 566 Patientinnen ausgewertet, die mit Vitamin E supplementiert wurden, aber auch hier konnte keine Verbesserung des Schwangerschaftsergebnisses oder der Präeklampsierate beobachtet werden.

Gelegentlich wurde berichtet, dass die gemessenen Spiegel von antioxidativen Vitaminen (v.a. Vitamin E) bei Patientinnen mit Präeklampsie sogar erhöht sind. Es wird diskutiert, dass dies die Folge einer kompensatorischen Hochregulation sein könnte. Llurba et al. [2] stellten in einer umfangreichen Studie zum oxidativen Stress bei Präeklampsie die These auf, dass oxidativer Stress in leichter Form wohl an der Pathogenese der Präeklampsie beteiligt ist, aber nicht als ein die Erkrankung auslösender relevanter Faktor angesehen werden kann. Insbesondere waren in dieser Studie die Vitamin-E-Spiegel präeklampsischer Frauen gegenüber den Werten normotensiver Kontrollen erhöht, was als physiologische reaktive Aktivierung bei generell vermehrtem oxidativem Stress gewertet wurde.

Über den Einfluss einer Vitamin-B<sub>2</sub>-Substitution auf das Risiko, an einer Präeklampsie zu erkranken, berichteten Anfang 2006 Neugebauer et al. [23] und fanden in einer prospektiven randomisierten Studie in einem Kollektiv von über 800 schwangeren Patientinnen in Burkina Faso keinen präventiven Effekt einer täglichen Supplementierung von 15 mg Riboflavin. Allerdings war in dieser Studie die Gesamtzahl der Erkrankten mit 3,6% sehr niedrig, über schwere Ausprägungsformen der Präeklampsie wurde nicht berichtet.

Interessanterweise wird in der vorliegenden Arbeit eine deutliche Erhöhung der untersuchten antioxidativen Marker bei schweren Präeklampsieformen beobachtet, wohingegen die genannten Vitaminspiegel bei leichten Krankheitsausprägungen das Niveau des gesunden Kontrollkollektivs zu den genannten Schwangerschaftszeitpunkten sogar noch unterschreiten. Möglicherweise führt erst ein extremer Verbrauch antioxidativer Valenzen, wie er bei der schweren Präeklampsie auftritt, zur exzessiven Gegenregulation durch antioxidative Valenzen, wohingegen bei leichten Formen oder bei schwangerschaftsinduzierter Hypertonie ohne Proteinurie lediglich ein Verbrauch ohne signifikante Gegenregulation beobachtet wird. Die Frage, ob es vor der Randomisierung der Patientinnen in die entsprechenden Studienarme möglicherweise bereits eine Korrelation zwischen FAD-Spiegeln und hohen oder niedrigen Vitaminspiegeln gegeben hat, kann aufgrund der geringen Fallzahl leider nicht beantwortet werden. Für die signifikante Erhöhung der FAD-Spiegel in der 20. bis 28. SSW bei Patientinnen mit schwerer Präeklampsie kommt kausal auch eine Retention bei eingeschränkter Nierenfunktion durch eine reversible Organschädigung im Zuge der Erkrankung in Betracht [24].

Eine entscheidende Rolle bei dieser Frage spielt sicher die Auswahl des Studienkollektivs. Ernährungsdefizite werden erst bei extremer Ausprägung pathophysiologische Relevanz erreichen. Eine Prävention mittels Supplementierung von Antioxidanzien wird nur in einer Population Erfolg haben, in der eine deutliche Unterversorgung mit solchen Vitaminen vorliegt und daher ein wichtiger Teil der beobachteten Präeklampsiefälle von solchem Mangel an Antioxidanzien verursacht ist.

Schon das beobachtete Kollektiv von Frauen in Venezuela profitiert nicht von einer Vitamin-E- und -A-Substitution im Rahmen der Einnahme von Multivitaminpräparaten im Hinblick auf die Häufigkeit einer Präeklampsie. In Tansania lagen die gemessenen

Vitaminspiegel deutlich unterhalb der Level des venezolanischen Kollektivs, der Einfluss einer E- und A-Substitution im Zusammenhang mit der Einnahme von Multivitaminpräparaten konnte in diesem Kollektiv aber nicht ausgewertet bzw. nicht beobachtet werden. Hier ist möglicherweise von einem Bias bezüglich der beschriebenen Ergebnisse auszugehen.

Der Startzeitpunkt für die Einnahme der Studienmedikation wurde zum einen aus praktischen Gründen gewählt (viele Frauen aus Venezuela und Tansania suchten die Schwangerschaftsvorsorge zu einem früheren Zeitpunkt nicht auf). Zum anderen findet um die 20. SSW die 2. Phase der Trophoblasteninvasion ins mütterliche Myometrium statt, bei der ein Riboflavinmangel eine pathogenetische Bedeutung haben könnte [16]. Eine Toxizität des Riboflavins während der Schwangerschaft ist in der Literatur nicht beschrieben, eine Höchstdosis wird nicht angegeben. Die Dosierung von 15 mg/Tag wurde gewählt, um eine realistische Hochdosis-Supplementierung zu gewährleisten.

Limitationen der Studie waren unter anderem die differierende Anzahl aufgearbeiteter Proben von Vitamin B<sub>2</sub> im Vergleich zu E und A, wohl aufgrund von unterschiedlichen Transportbedingungen der Proben aus dem jeweiligen Zentrum nach Deutschland. Die Wahrung der Kühlkette sowie Lichtschutz konnte dabei jedoch sichergestellt werden und die Auswertung aller Proben (Venezuela und Tansania) erfolgte unter gleichen, standardisierten Bedingungen am Institut für Klinische Chemie der Universitätsklinik Mannheim. Weiterhin ist als Schwäche der Studie sicherlich die unterschiedliche Gesamtfallzahl beider Studienzentren zu nennen. Insbesondere der Eingang der Vitaminergebnisse des erheblich kleineren Kollektivs aus Tansania in die Gesamtstatistik könnte aufgrund der unterschiedlichen Grundsituation beider Studienzentren einem Bias unterliegen.

Die tatsächliche Erhöhung der FAD-Spiegel in der Studiengruppe werten wir als positive Compliance-Kontrolle bez. der Einnahme der Studienmedikation (● **Abb. 7**).

Eine hoch dosierte Vitamin-B<sub>2</sub>-Substitution scheint dennoch einen Teil der schweren Präeklampsieformen im untersuchten Kollektiv verhindern zu können. Zur Frage, ob letztendlich die hoch dosierte tägliche Riboflavingabe ab der 20. SSW Fälle von Präeklampsie verhindern kann, wird auf die Endpunktauswertung der PROPER-Studie verwiesen [1].

## Fazit

Der Nutzen einer generellen Supplementierung mit Antioxidanzien bleibt daher vor diesen Ergebnissen weiterhin infrage gestellt.

Durch die vorliegenden Resultate wird weiterhin die Hypothese bekräftigt, dass die Pathogenese der Präeklampsie die Endstrecke unterschiedlicher Störungen darstellt, die alle in ein einheitliches Krankheitsbild münden. Der Einfluss einer isolierten Störung wie ein isoliert auftretender Vitamin-E-, -A- oder -B<sub>2</sub>-Mangel ist wahrscheinlich gering. Oxidativer Stress und antioxidative Kapazität beinhaltet ein Zusammenspiel zahlreicher Faktoren und zukünftige Präventionsstrategien sollten daher idealerweise mehrere antioxidative Prinzipien kombinieren.

## Danksagung

Finanziell unterstützt wurde die Studie von der medizinischen Fakultät Mannheim der Universität Heidelberg sowie von der

BASF Aktiengesellschaft Ludwigshafen (Studentenförderung). Die Autoren versichern, dass sie keine finanziellen Verbindungen mit der BASF AG oder einer anderen für den Artikel relevanten Firma haben. Die Autoren möchten E. Hannak, A. Osuna, J. Uzcategui und P. Bogucki für den technischen und logistischen Support in Venezuela danken.

### Interessenkonflikt

In der hier vorliegenden Arbeit wurden lediglich die biochemischen Serumparameter antioxidativer Vitamine von Patientinnen der PROPER-Studie ausgewertet. Ein Interessenkonflikt mit der Hauptstudie besteht nicht, die Autoren sind identisch.

### Institute

- <sup>1</sup> Frauenklinik, St. Josefs-Hospital Wiesbaden, Wiesbaden
- <sup>2</sup> Programa de Prevención de Preeclampsia (PPP), Mérida, Venezuela
- <sup>3</sup> Kilimanjaro Christian Medical Center (KCMC), Moshi, United Republic of Tanzania
- <sup>4</sup> Frauenklinik, Klinikum Bielefeld, Bielefeld
- <sup>5</sup> Frauenklinik, Fürst-Stirum-Klinik Bruchsal, Bruchsal
- <sup>6</sup> Beth Israel Deaconess Medical Center, Harvard Medical School, Boston, USA

### Literatur

- 1 *Elsen C, Rivas-Echeverría C, Sahland K et al.* Prevention of Preeclampsia by high Dose Riboflavin Supplementation: a randomized controlled Trial. Proceedings of the World medical Conference. Proceedings of the 2nd international Conference on Obstetrics and Gynaecology (Obstetrics and Gynaecology '11). Prague, Czech Republic: WSEAS Press; 2011: 188–191
- 2 *Llurba E, Gratacos E, Martín-Gallan P et al.* A comprehensive study of oxidative stress and antioxidant status in preeclampsia and normal pregnancy. *Free Radic Biol Med* 2004; 37: 557–570
- 3 *Osungbade KO, Ige OK.* Public health perspectives of preeclampsia in developing countries: implication for health system strengthening. *J Pregnancy* 2011; 2011: 481095
- 4 *Pecks U, Schiessl B, Fitzner C et al.* Evaluation der Serumlipoproteinkonzentrationen und des oxidativ modifizierten LDLs von Schwangeren und deren Fetten bei intrauteriner Wachstumsrestriktion und Präeklampsie. *Geburtsh Frauenheilk* 2011; 71 – G\_2
- 5 *Roberts JM, Hubel CA.* Is oxidative stress the link in the two-stage model of preeclampsia? *Lancet* 1999; 354: 788–789
- 6 *Hubel CA, Roberts JM, Taylor RN et al.* Lipid peroxidation in pregnancy: New perspectives on preeclampsia. *Am J Obstet Gynecol* 1989; 161: 1025–1034
- 7 *Roberts JM, Taylor RN, Musci TJ et al.* Preeclampsia: an endothelial cell disorder. *Am J Obstet Gynecol* 1989; 161: 1200–1217
- 8 *Greer I.* Neutrophil activation in pregnancy-induced hypertension. *Br J Obstet Gynaecol* 1989; 96: 978–982
- 9 *Benyo DF, Smarason A, Redman CW et al.* Expression of inflammatory cytokines in placentas from women with preeclampsia. *J Clin Endocrinol Metab* 2001; 86: 2505–2512
- 10 *Many A, Hubel CA, Fisher SJ et al.* Invasive cytotrophoblasts manifest evidence of oxidative stress in preeclampsia. *Am J Pathol* 2000; 156: 321–331
- 11 *Heinle H.* Physiologie und Pathophysiologie der Arterien. In: Marshall M, Breu FX, Hrsg. *Handbuch der Angiologie*. Landsberg: Ecomed Verlagsgesellschaft 1999; II-1.2: 1–13
- 12 *Kukreja RC, Kontos HA, Hess ML et al.* PGH synthase and lipoxygenase generate superoxide in the presence of NADH or NADPH. *Circ Res* 1986; 59: 612–619
- 13 *Yanik FF, Amanvermez R, Yanik A et al.* Preeclampsia and eclampsia associated with increased lipid peroxidation and decreased serum vitamin E levels. *Int J Gynecol Obstet* 1999; 64: 27–34
- 14 *Gülmezoglu AM, Hofmeyr GJ, Oosthuisen MM et al.* Antioxidants in the treatment of severe preeclampsia: an explanatory randomised trial. *Br J Obstet Gynaecol* 1997; 104: 689–696
- 15 *Chappell LC, Seed PT, Briley AL et al.* Effect of antioxidants on the occurrence of pre-eclampsia in women at increased risk: a randomised trial. *Lancet* 1999; 345: 810–816
- 16 *Wacker J, Frühauf J, Schulz M et al.* Riboflavin deficiency and preeclampsia. *Obstet Gynecol* 2000; 96: 38–44
- 17 *Rivas-Echeverría C.* Programa de Prevención de Preeclampsia. Mérida, Venezuela: Ministerio de Salud y Desarrollo Social; 1993
- 18 *Capo-Chichi CD, Feillet F, Gueant JL et al.* Concentrations of riboflavin and related organic acids in children with protein-energy malnutrition. *Am J Clin Nutr* 2000; 71: 978–986
- 19 *Beazley D, Ahokas R, Livingston J et al.* Vitamin C and E supplementation in women at high risk for preeclampsia: A double-blind, placebo-controlled trial. *Am J Obstet Gynecol* 2005; 192: 520–521
- 20 *Poston L, Briley AL, Seed PT et al.* Vitamin C and vitamin E in pregnant women at risk for pre-eclampsia. *Lancet* 2006; 367: 1145–1154
- 21 *Rumbold AR, Maats FH, Crowther CA.* Dietary intake of vitamin C and vitamin E and the development of hypertensive disorders of pregnancy. *Eur J Obstet Gynecol Reprod Biol* 2005; 119: 67–71
- 22 *Rumbold AR, Middleton P, Crowther CA.* Vitamin supplementation for preventing miscarriage. *The Cochrane Library*. Chichester: John Wiley & Sons, Ltd.; 2005
- 23 *Neugebauer J, Zanré Y, Wacker J.* Riboflavin supplementation and preeclampsia. *Int J Gynecol Obstet* 2006; 93: 136–137
- 24 *Verlohren S, Dudenhausen JW.* Präeklampsie und hypertensive Schwangerschaftserkrankungen. *Geburtsh Frauenheilk* 2012; 72: 496–498
